# Supplementary material
Source: publisher figshare collection journal article supplement (https://acs.figshare.com/ndownloader/files/4646872)
Supplement: Supplementary file 1 [file 4646872]

## **Supporting Information for**

# **Direct Assay of Enzymes in Heme Biosynthesis for the Detection of Porphyrrias by Tandem Mass Spectrometry. Part 2. Porphobilinogen Deaminase**

Yuesong Wang,<sup>1</sup> C. Ronald Scott,<sup>2</sup> Michael H. Gelb<sup>1,3\*</sup> and František Tureček<sup>1\*</sup>

<sup>1</sup>Department of Chemistry, <sup>2</sup>Pediatrics, and <sup>3</sup>Biochemistry, University of Washington, Seattle, WA 98195, USA

Manuscript submitted to *Analytical Chemistry*, November 2007

## **Oxidation Measurements**

### **Experiment A: Uroporphyrinogen + Blood + blank assay + Incubation at 37 °C for 30 minutes.**

PBGD assay buffer (50  $\mu$ L; 100 mM Tris-HCl, pH 8.2) was added to a 1.5 mL polypropylene microfuge tube followed by 10  $\mu$ L uroporphyrinogen I (225  $\mu$ M), 60  $\mu$ L (~ 2 mg hemoglobin) of diluted red blood cell lysates, and 130  $\mu$ L distilled water. The tube was capped and incubated in a water bath at 37 °C for 30 minutes. The water bath chamber was covered with foil to exclude light. After incubation, the reaction was quenched in an ice bath. Ammonium formate buffer solution (150  $\mu$ L; 1.0 M, pH 3.17) was added to adjust pH to the appropriate range for extraction, followed by *n*-butanol (400  $\mu$ L), and heptacarboxylporphyrin I (15  $\mu$ L, 20  $\mu$ M, 1 M HCl) as internal standard. The mixture was placed on a vortex mixer for 30 seconds before and then centrifuged at 15,000 g for 3 minutes. The top 300  $\mu$ L of supernatant was transferred using a pipettor with a polypropylene tip to a new 1.5 mL polypropylene microfuge tube containing 150

μL ammonium formate (20 mM, pH 3.17). The mixture was placed on a vortex mixer for 30 sec and centrifuged again for 3 min. The top 150 μL butanol layer was transferred to another microfuge tube for ESI-MSMS analysis.

**Experiment B: Uroporphyrinogen + Blood + blank assay, without incubation;**

Same as A (without incubation), only different sample processing step. 10 μl Uroporphyrinogen I (225 μM), 60 μl (~ 2 mg hemoglobin) of diluted red blood cell lysates were added to the blank assay tube, and sample processing step was carried out immediately, without incubation step.

**Experiment C: Uroporphyrinogen + blank assay, without incubation.**

10 μl Uroporphyrinogen I (225 μM) was added to the blank assay tube, and the sample processing step was carried out immediately, without incubation step.

**Recovery Measurements**

The recovery yield was measured by comparison of MS signals after extraction using standard sample additions that were added before and after extraction. One more additional washing step compared to the normal sample processing procedure was used to avoid salt matrix effects when adding standards after extraction. Half amount of standards was added after extraction for half amount of butanol solvent was used at the last step. Direct injection was used in MS analysis.

Recovery Yield: 90%.

**Experiment A:** 7.5 μL uroporphyrinogen I (1 M HCl) and 7.5 μL heptaporphyrin I (1M HCl) were added to 1.5 mL polypropylene microfuge tube with PBGD assay buffer (50 μL; 100 mM

Tris-HCl, pH 8.2) and 200  $\mu$ L water. Ammonium formic buffer solution (150  $\mu$ L; 1.0 M, pH 3.17) was added to adjust pH to the appropriate range for extraction, followed by *n*-butanol (400  $\mu$ L). The mixture was placed on a vortex mixture for 30 seconds before being centrifuged at 15,000 g for 3 minutes. The top 300  $\mu$ L of supernatant was transferred using a pipettor with a polypropylene tip to a new 1.5 mL polypropylene microfuge tube containing 150  $\mu$ L ammonium formate (20 mM, pH 3.17). The mixture was placed on a vortex mixer for 30 sec and centrifuged again for 3 min. The top 200  $\mu$ L butanol layer was transferred to another microfuge tube, followed by adding 150  $\mu$ L ammonium formate (20 mM, pH 3.17) and 7.5  $\mu$ L HCl (1 M). The mixture was placed on a vortex mixture for 30 seconds before being centrifuged at 15,000 g for 3 minutes. The top 100  $\mu$ L was used for MS analysis.

**Experiment B:** 15  $\mu$ L HCl (1 M) was added to 1.5 mL polypropylene microfuge tube with PBGD assay buffer (50  $\mu$ L; 100 mM Tris-HCl, pH 8.2) and 200  $\mu$ L water. Sample processing step was the same as Experiment A. 3.75  $\mu$ L uroporphyrinogen I (1 M HCl) and 3.75  $\mu$ L heptaporphyrin I (1M HCl) were added instead of 7.5  $\mu$ L HCl (1 M) at the last washing step.

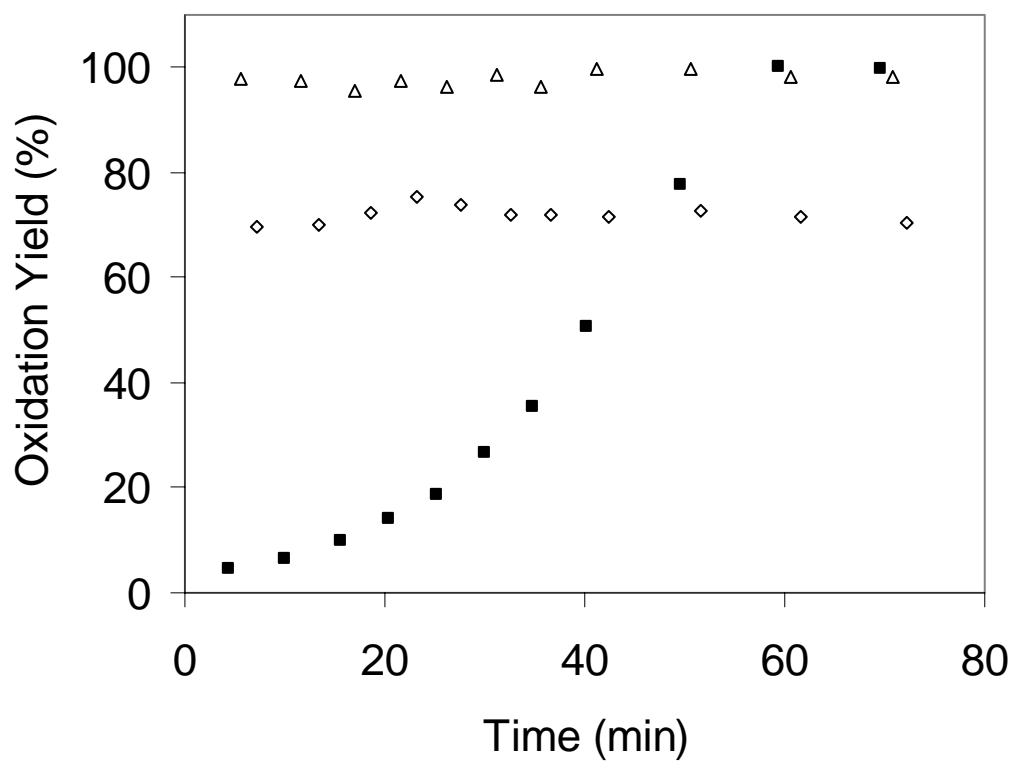

Figure S1. Oxidation and recovery experiments. Diamonds: Experiment A; triangles: Experiment B; solid squares: Experiment C.

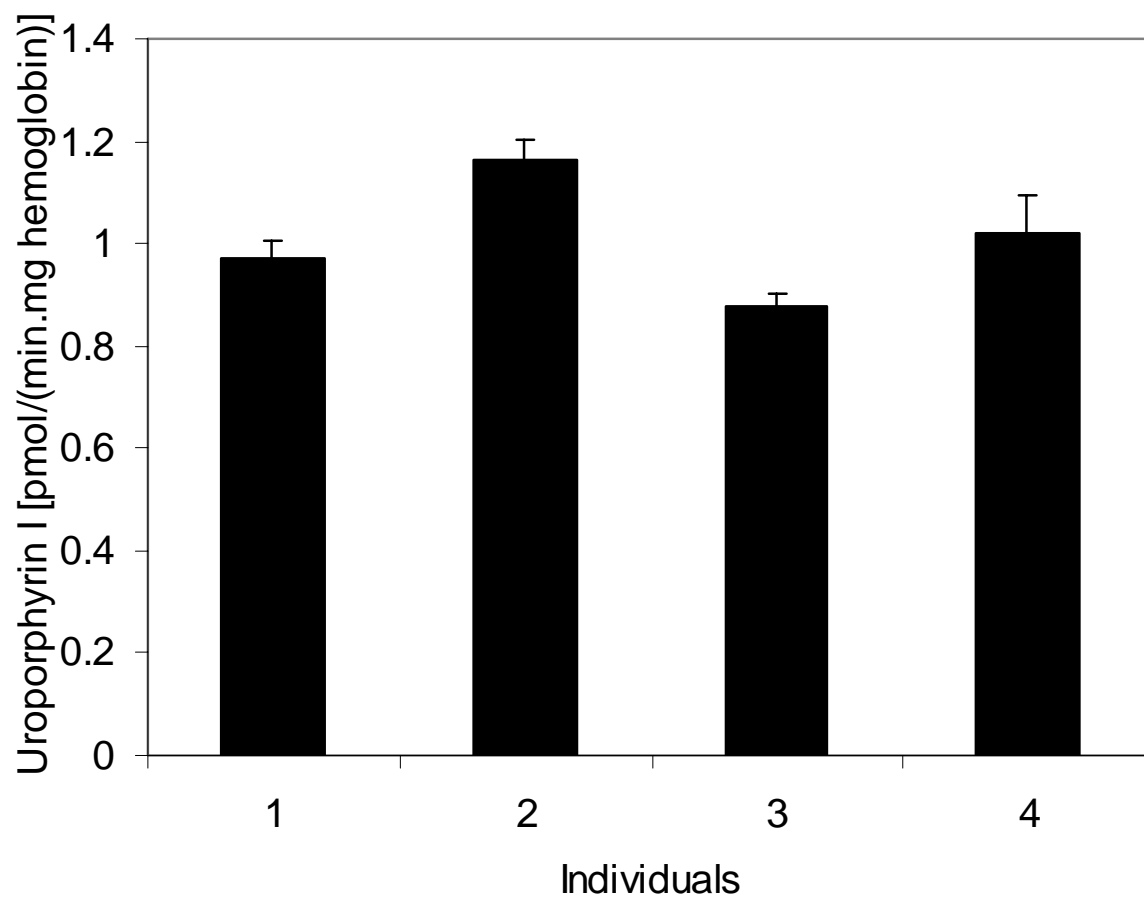

Figure S2. PBGD activity in four healthy individuals. The error bars are standard deviations from triplicate measurements.

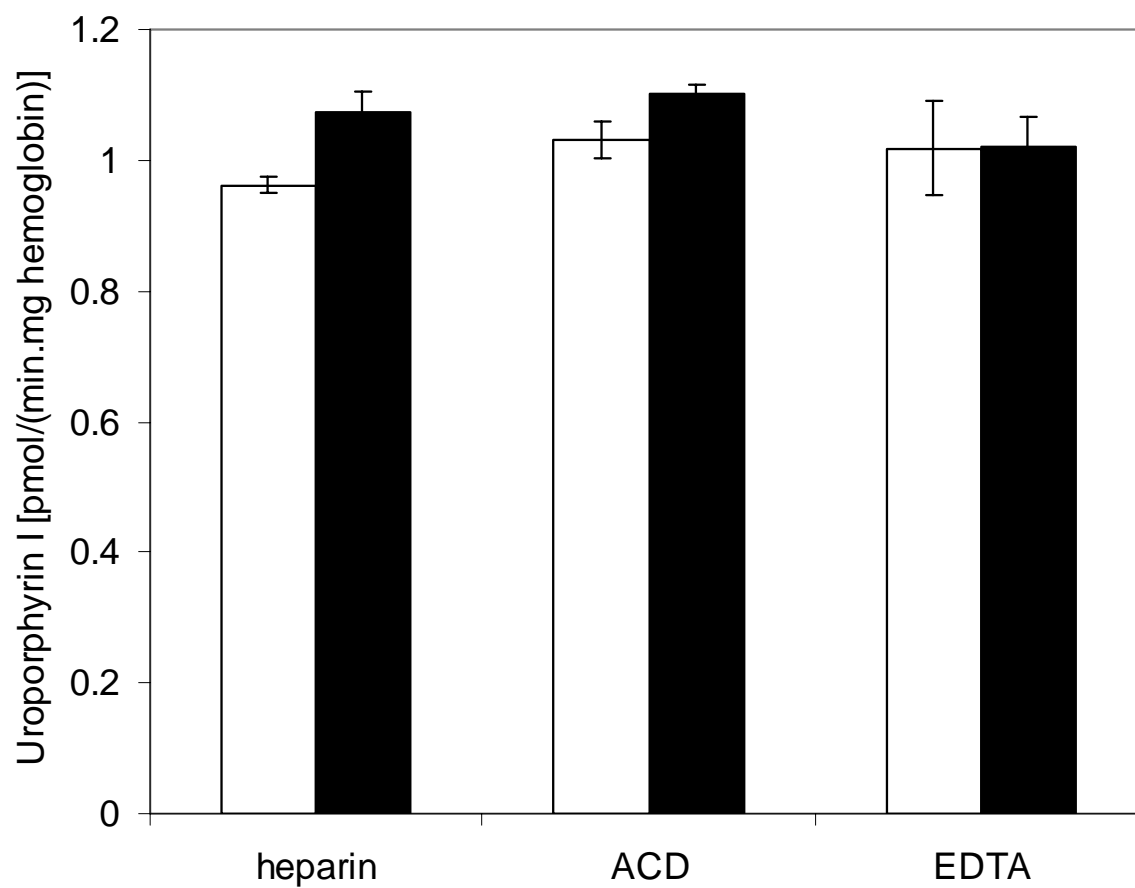

Figure S3. PBGD activity using different anticoagulants. White bar: fresh blood; solid bar: blood stored at 4 °C for 2 days. For abbreviations see the main text.

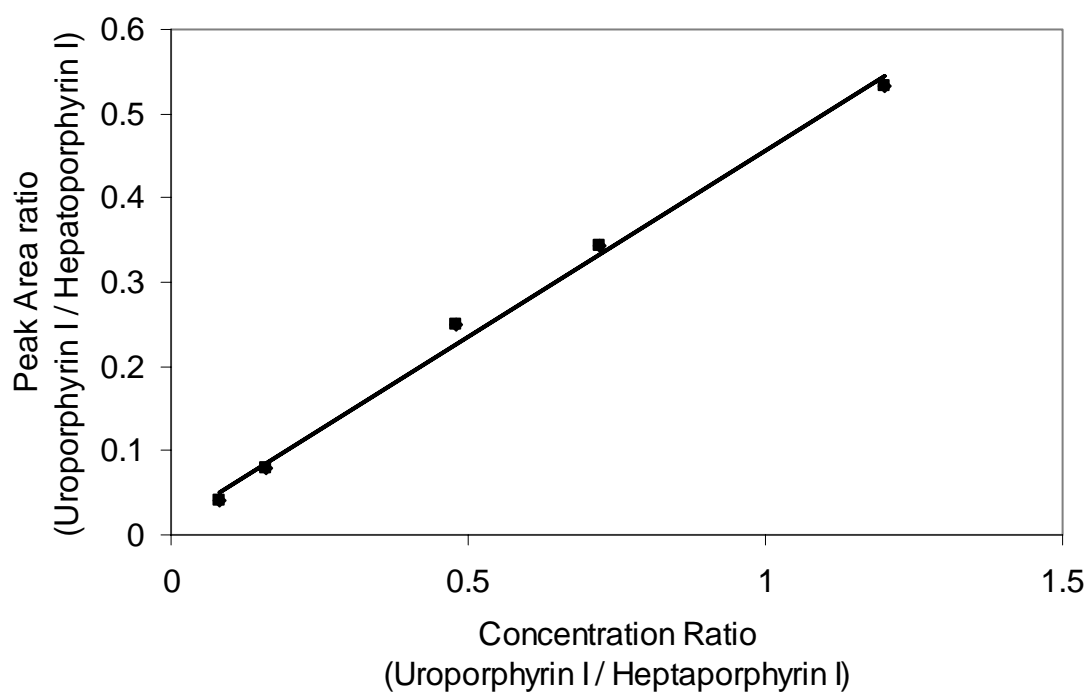

Figure S4. Calibration Curve (heptacarboxylporphyrin I: 300 pmol), and calibration curve was prepared according to the standard sample processing procedure after incubation.
